# Supplementary material
Source: ML conference proceedings conference paper supplement (https://proceedings.neurips.cc/paper_files/paper/2012/hash/0a09c8844ba8f0936c20bd791130d6b6-Abstract.html)

# Learning Image Descriptors with the Boosting-Trick

Tomasz Trzcinski, Mario Christoudias, Vincent Lepetit and Pascal Fua  
CVLab, EPFL, Lausanne, Switzerland  
firstname.lastname@epfl.ch

## Supplementary Material

Quantitative results across all splits of train and test datasets are shown, comparing our Low-Dimensional Boosted Gradient Maps descriptor to the baseline approaches discussed in the paper. Our approach significantly outperforms the baseline techniques across all splits.

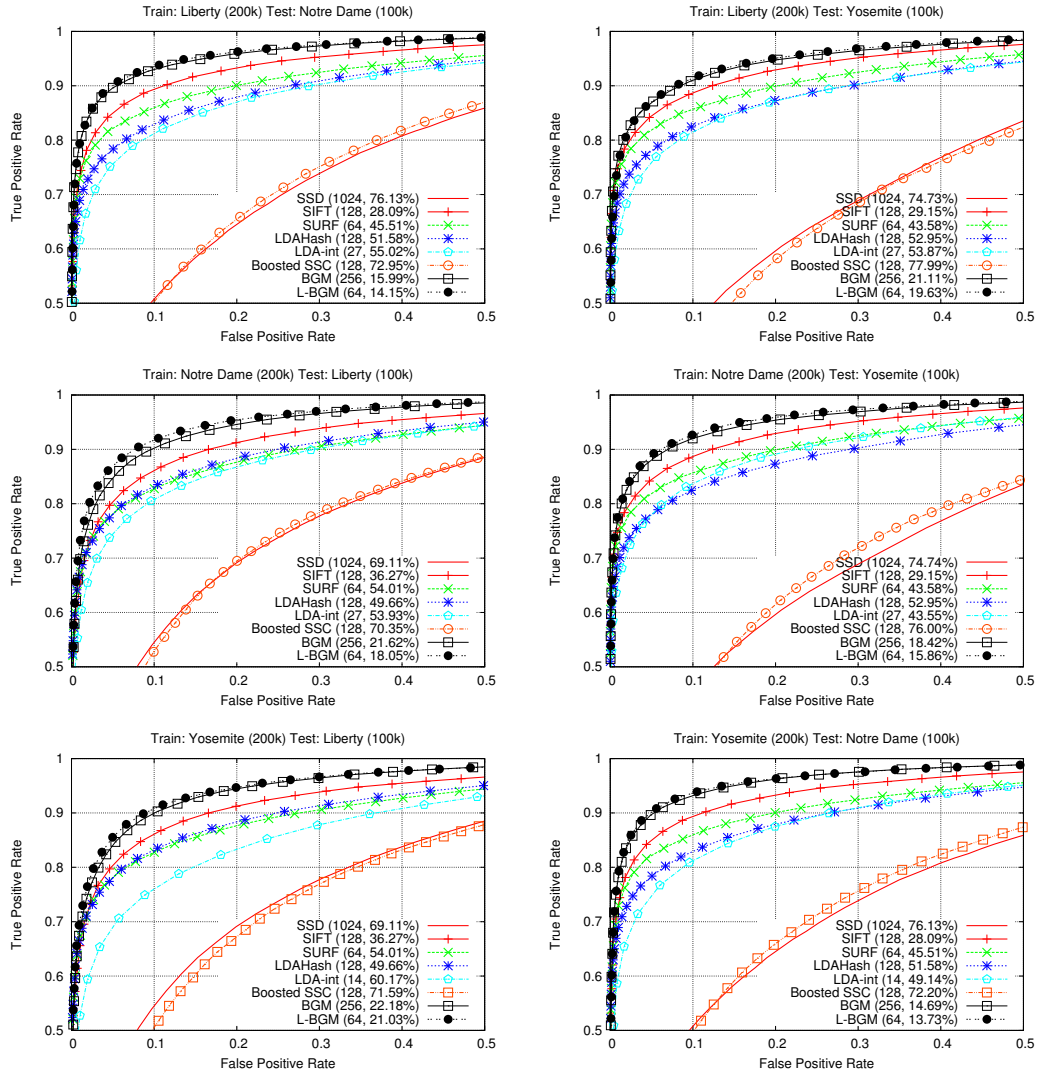

Supplement: Supplementary file [file 0a09c8844ba8f0936c20bd791130d6b6-Supplemental.zip]
